# Supplementary material
Source: PubMed Central journal article supplement (PMC6763989)

## Supplementary Online Content

Coutts SB, Moreau F, Asdaghi N, et al; Diagnosis of Uncertain-Origin Benign Transient Neurological Symptoms (DOUBT) Study Group. Rate and prognosis of brain ischemia in patients with lower-risk transient or persistent minor neurologic events. *JAMA Neurol*. Published online September 23, 2019.

doi:10.1001/jamaneurol.2019.3063

**eFigure 1.** Onset to MR Time Distribution

**eFigure 2.** Association Between Evidence of Ischemia on MR Imaging and Persisting or Completely Resolved Symptoms

**eFigure 3.** Association Between Symptom Resolution Among Participants with a Normal Neurologic Examination

**eFigure 4.** Pre-MRI Clinical Diagnosis Stratified by MRI Result

This supplementary material has been provided by the authors to give readers additional information about their work.

**eFigure 1.** Onset to MR Time Distribution

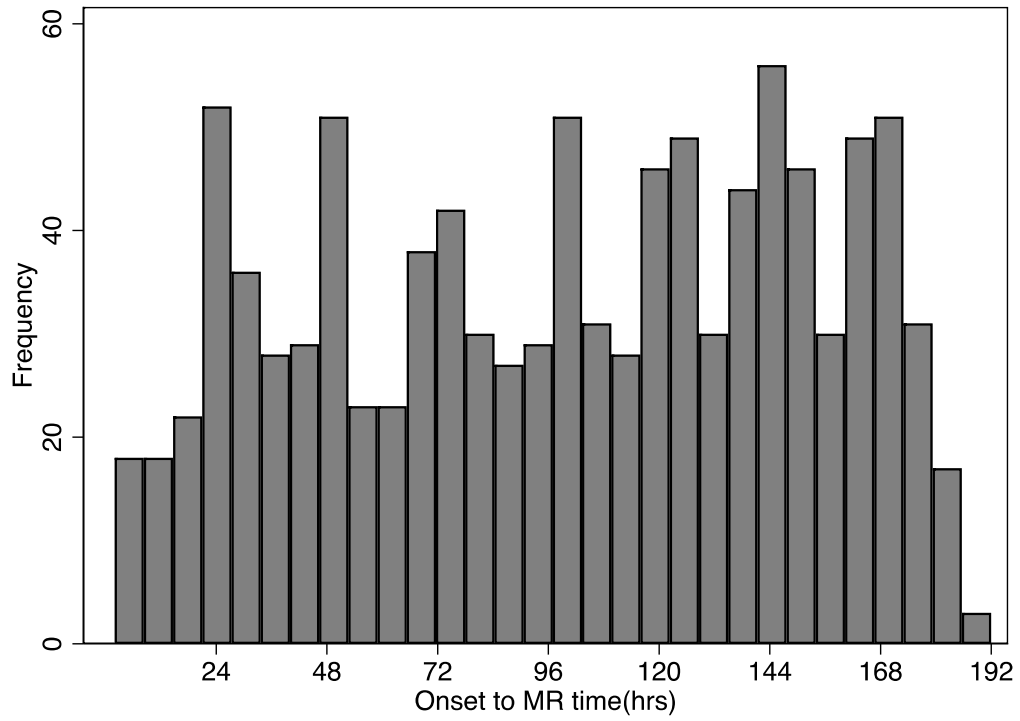

**eFigure 2.** Association Between Evidence of Ischemia on MR Imaging and Persisting or Completely Resolved Symptoms

Complete resolution of symptoms was determined at the time of enrolment which occurred a median of 50 hours (IQR 15.5-105.5 hours) from symptom onset. Persistence of symptoms was a predictor of finding a DWI positive lesion, but inadequately discriminative to obviate MR imaging. Many (81%) patients with persisting symptoms still had a negative MR imaging.

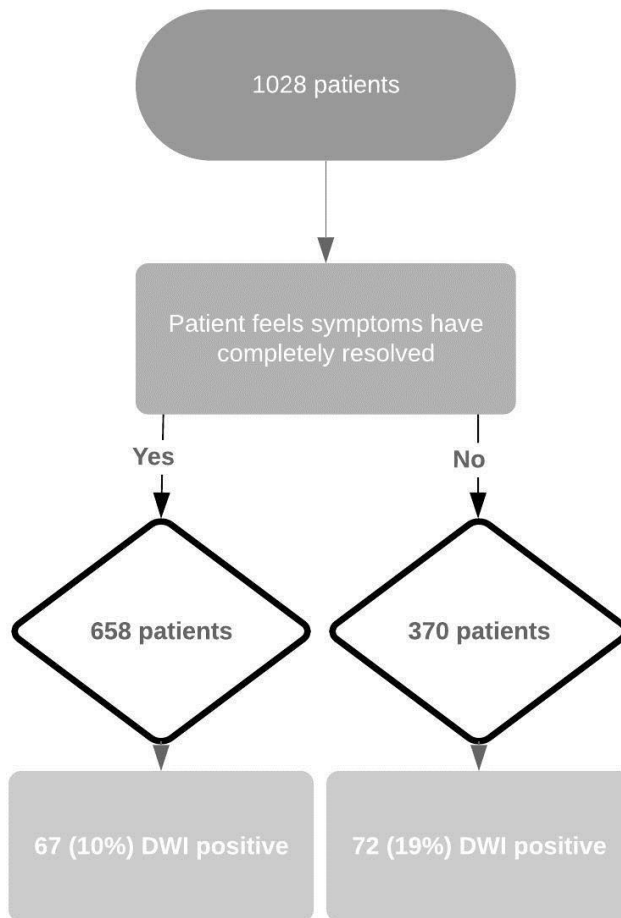

**eFigure 3.** Association Between Symptom Resolution Among Participants With a Normal Neurologic Examination

Despite a normal neurological exam, 1 in 5 participants reported persisting symptoms. Even among those reporting full resolution of symptoms 1 in 10 had an observable ischemic lesion on MR imaging.

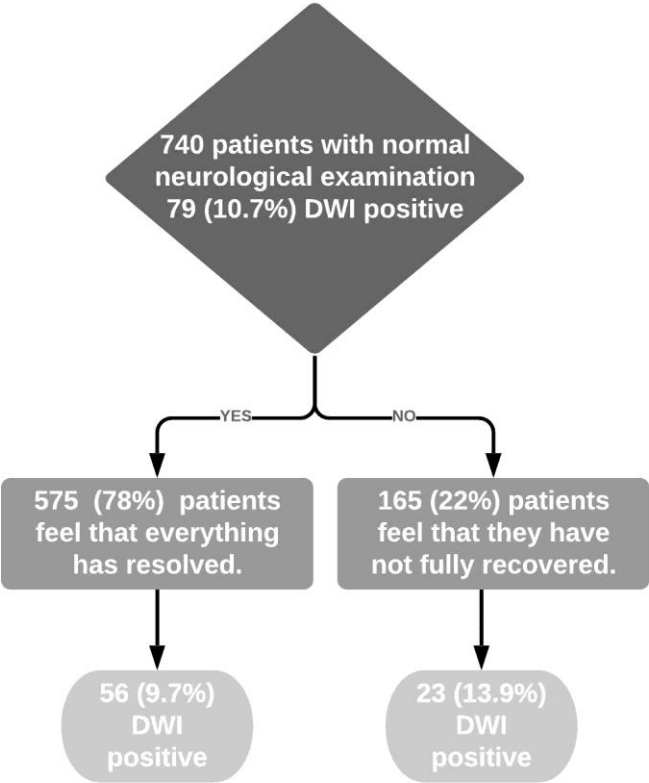

### eFigure 4. Pre-MRI Clinical Diagnosis Stratified by MRI Result

Pre-MRI clinical diagnosis stratified by MRI result (blue = DWI negative, red = DWI positive) by proportion (eFigure 4A) and total count of subjects (eFigure 4B). Pre-MRI clinical diagnosis is shown on the left. All red bars below the diagnosis of possible TIA represent an incorrect clinical diagnosis prior to imaging).

#### eFigure 4A.

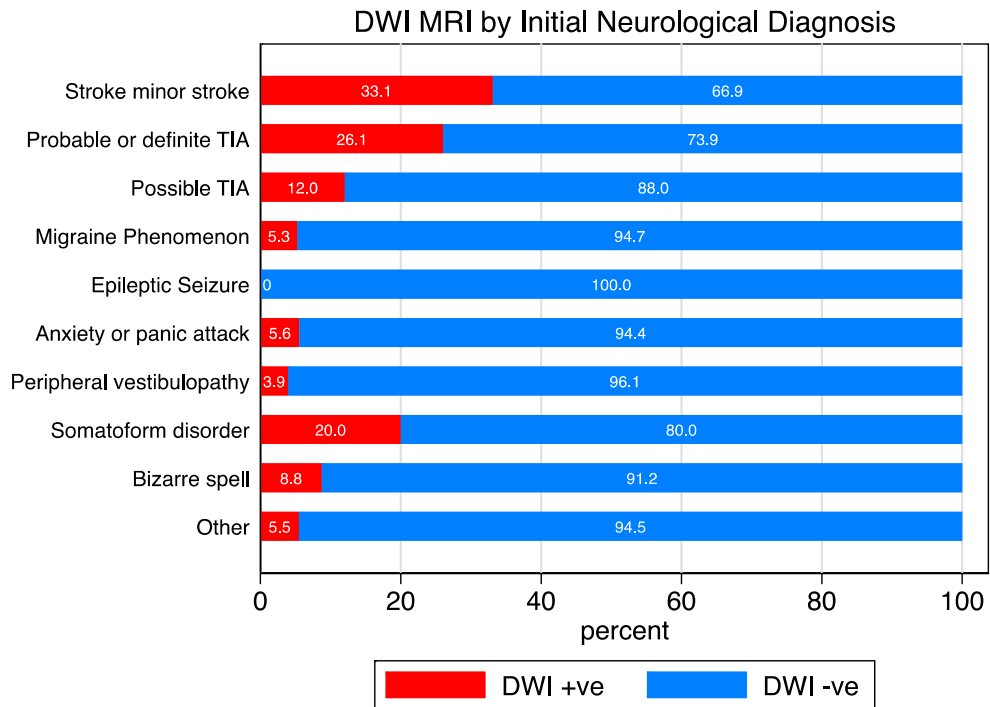

**eFigure 4B.**

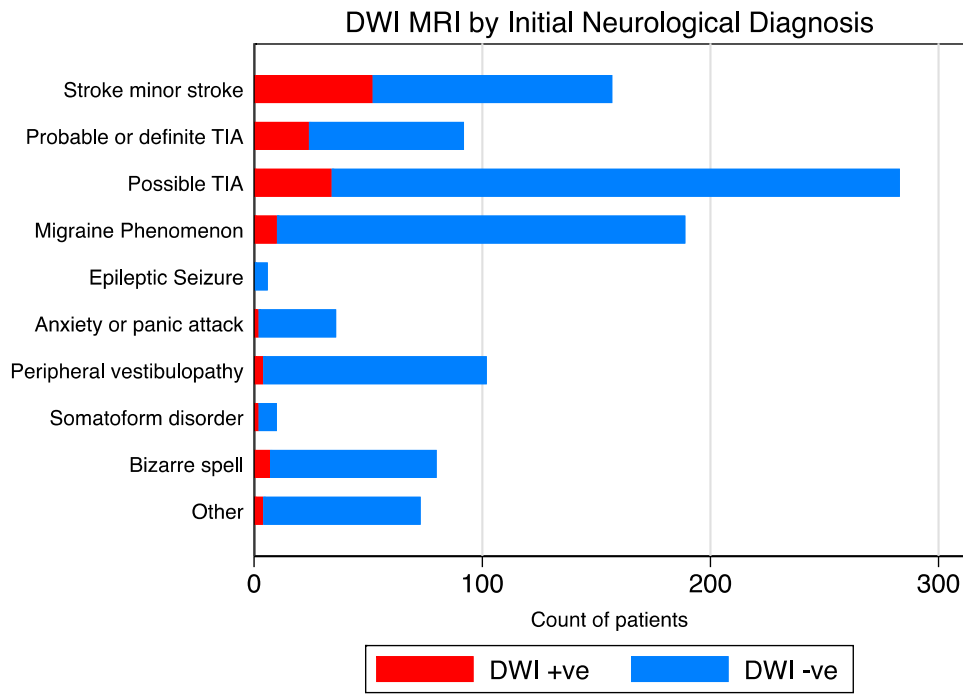

Supplement: jamaneurol-76-1439-s001.pdf [file jamaneurol-76-1439-s001.pdf]
